## ◆ EDITORIAL VIEWS

Anesthesiology  
1999; 90:645-8  
© 1999 American Society of Anesthesiologists, Inc.  
Lippincott Williams & Wilkins, Inc.

### ***How Carefully Can We Phenotype Patients Suspected of Malignant Hyperthermia Susceptibility?***

IN this issue of ANESTHESIOLOGY, Fletcher *et al.*<sup>1</sup> compare the European and North American protocols for laboratory diagnosis of malignant hyperthermia (MH) using halothane contracture. This carefully executed study concludes that muscle biopsy results, by either protocol, correlate sufficiently well to permit the use of either test for determining a patient's phenotype (clinical expression of an inherited disorder) for molecular genetic study. Even though genetic research demands accurate phenotyping, does it matter whether clinicians accurately phenotype or label patients as MH susceptible in their clinical practices?

Yes. When we fail to diagnose MH susceptibility accurately, we end up labeling significant segments of our population MH susceptible. Because MH susceptibility follows autosomal dominant inheritance, diagnosis of MH susceptibility in a patient necessarily affects the family. MH-susceptible patients and their unevaluated but labeled "blood" relatives will not benefit from many routine anesthetic techniques and will require prolonged postanesthetic observation times. Those labeled as MH susceptible will be prevented from enlisting in the military forces and may not be allowed to serve in police or fire departments. In the United States, many MH-susceptible people and their families will experience difficulty obtaining adequate health, disability, and life insurance. Once labeled MH susceptible, patients and their incompletely evaluated relatives must notify all of their health care providers (including emergency medical technicians, emergency physicians, intensivists, respiratory therapists, perfusionists, oral surgeons, nurse anesthetists, and anesthesiologists) of their diagnosis and appropriate treatment. Once a patient is labeled MH

susceptible, it becomes difficult to remove the label. Before a recent study by Bachand *et al.*,<sup>2</sup> 1.2% of the population of a region in Northwestern Quebec were labeled MH susceptible. As a result of their extraordinary efforts, which included retrieval of more than 2,000 medical charts and evaluation of nearly 1,600 general anesthetic records, Bachand *et al.*<sup>2</sup> removed the MH-susceptible label from more than 1,000 patients. Now, only 0.47% of that population needs to be managed as MH susceptible. The US population would benefit from a similar reassessment of MH clinical status.<sup>3</sup>

In the past decade, four significant advances have improved the accuracy of MH diagnosis. First, a comprehensive clinical case definition for MH has been accepted and, through the use of the "MH clinical grading scale," the *clinical* likelihood of MH susceptibility can be estimated.<sup>4</sup> To ensure its proper application, clinicians are urged to measure temperature, expired CO<sub>2</sub>, blood gases, creatine kinase, and potassium levels in all suspected MH episodes. Second, the European and North American MH diagnostic protocols have been standardized.<sup>5,6</sup> Third, sensitivity and specificity for phenotype determination by these diagnostic tests have been determined.<sup>7,8</sup> *Sensitivities*, defined as the ability of the test to detect disease when disease is present, are 97-99%. This means that false-negative results are rare, so clinicians can safely administer MH-triggering anesthetic agents to a patient who has had a negative MH muscle biopsy. However, false-positive MH muscle biopsy results are more frequent: reported *specificities*, defined as the ability of the same test to rule out disease when disease is absent, are 78% for the North American protocol and 94% for the European protocol. Thus, some patients with positive MH muscle biopsies may not be truly MH susceptible. Fourth, MH mutations in two gene loci have been identified,<sup>9,10</sup> accounting for the inheritance of MH in 20-40% of MH families.<sup>11</sup> For families carrying known mutations, inheritance can be followed, with the proviso that no second MH mutation has appeared in the family under study.

Dr. Fletcher *et al.*<sup>1</sup> conclude that although either protocol can be applied to genetic studies, the European protocol might yield slightly better results. Unfortunately, as the authors acknowledge, the use of either the European or North American protocols leads to difficulty

This Editorial View accompanies the following article:  
Fletcher JE, Rosenberg H, Aggarwal M: Comparison of European and North American malignant hyperthermia diagnostic protocol outcomes for use in genetic studies. ANESTHESIOLOGY 1999; 90:654-61.

Accepted for publication December 15, 1998.

Key words: *CACNLIA3*; caffeine halothane contracture test; discordance; genotype; MH clinical grading scale; *RYR1*.



in genetic analysis<sup>12</sup> because both tests achieve high sensitivity at the cost of reduced specificity. Both false-negative and false-positive diagnoses will lead to discordance (lack of linkage) with the presence or absence of a defined mutation. This conclusion does not alter the clinical value of both tests, wherein high sensitivity is compatible with sound clinical practice.

Genetic linkage analyses published to date support only about 50% linkage to either of the two MH loci where mutations have been found that result in MH or central core disease (CCD) as the primary disease. These loci are the *RYR1* gene on chromosome 19q13.1<sup>13,14</sup> and the *CACNL1A3* gene on chromosome 1q32.<sup>15</sup> The *RYR1* gene encodes the skeletal muscle calcium-release channel (or "ryanodine receptor"); the *CACNL1A3* gene encodes the  $\alpha_1$  subunit of the skeletal muscle L-type, voltage-dependent calcium channel (or "dihydropyridine receptor"). Abnormalities in the products of either of these genes lead to abnormal regulation of calcium in skeletal muscle. Possible explanations for lack of linkage to either of these two loci are that there are additional MH loci,<sup>16</sup> that phenotyping has limited accuracy, or that multiple mutations segregate in some MH families.<sup>17</sup>

Figure 1 illustrates data selected from several European and North American laboratories<sup>\*,15,18,19</sup> Robinson *et al.*,<sup>18</sup> using the European protocol, observed linkage to chromosome 19q13.1 in 9 of 20 families studied (families 1–20). Linkage was excluded in three families on the basis of two or more recombinant events, manifested as discordance between the presence of MH and the presence of a specific marker for chromosome 19q, and in the remaining eight families, a single recombinant event was observed. Phillips *et al.*,<sup>19</sup> using the North American protocol, studied segregation of the *RYR1* mutation, R2433G, with MH in four families (families 23–26), finding concordance in two families (9/9 and 1/1) and discordance in two other families (3 discordant out of 20 and 1 discordant out of 2). Both of these studies illustrate linkage of MH to *RYR1* in about 50% of MH families.

A caveat, however, is that accurate linkage depends on accurate phenotypes, and the sensitivities and specificities of both the European and North American diagnostic protocols do not guarantee accuracy. Furthermore, the lack of perfect concordance between the European and North American phenotypic tests, reported in the paper by Fletcher *et al.*,<sup>1</sup> supports the conclusion that MH diagnostic

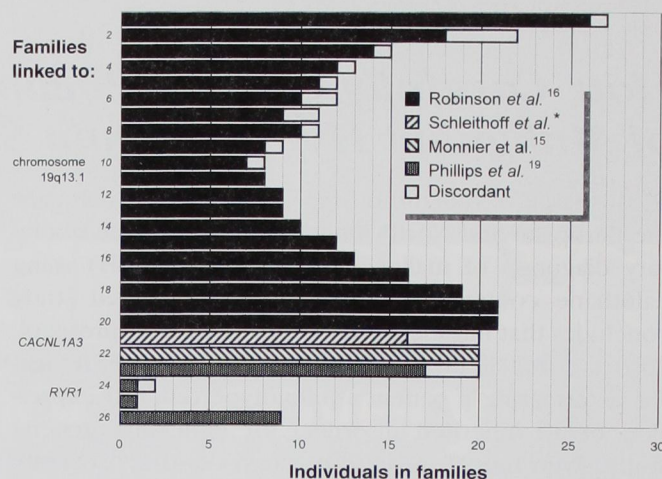

Fig. 1. A summary of linkage of MH to probable causal loci in 26 MH families. Families 1–20<sup>18</sup> represent data from a HOMOG linkage study of markers in chromosome 19q13.1–13.2, the location of the *RYR1* gene. The size of each family corresponds to the total number of persons studied. The number shown as discordant are listed as the minimum possible number of recombinants. Tests followed the European MH Group protocol.<sup>5</sup> Families 21 and 22 represent linkage of MH families to mutation at amino acid 1086 in the  $\alpha_1$  subunit of the DHP receptor encoded by the *CACNL1A3* gene.<sup>\*,15</sup> For family 21, only members of the left hand branch of the pedigree are included, and for both families 21 and 22, two MHE persons are considered to be concordant. Tests followed the European MH Group protocol. Families 23–26 are from Phillips *et al.*<sup>19</sup> and tests followed the North American MH Group protocol.<sup>6</sup>

testing does not provide unambiguous phenotyping for use in genetic tests. Figure 1 also illustrates that *CACNL1A3* mutations have shown linkage (concordance) for 19/19 members of one MH family (family 22),<sup>15</sup> but lack of linkage (discordance) for 4/31 members of another MH family (family 21),<sup>\*</sup> posing a parallel problem to that observed in linking MH to *RYR1*. To date, there has been full concordance between central core disease associated with MH (CCD/MH) and *RYR1*.<sup>9,10</sup> This is probably because of greater accuracy in phenotyping CCD patients on the basis of their characteristic clinical presentation and muscle histochemistry, in addition to their reaction to MH-triggering agents.

What research directions are likely to improve the phenotypic diagnosis of MH? First, the search for new contracture tests might lead to greater accuracy. Recent evaluations of the ryanodine contracture test, however, show overlap between contractures of MH-negative and MH-susceptible patients, that are consistent with the same sensitivity and specificity as caffeine halothane contracture tests.<sup>20</sup> Investigators are testing 4-chloro-m-cresol, a succinylcholine solvent that modulates calcium release channel gating, to determine whether it will help improve contracture test specificity.<sup>21,22</sup>

\* Personal communication by Dr. Frank Lehmann-Horn regarding manuscript by Schleithoff L, Paul S, Deufel T, Hogan K, Lehmann-Horn F, Jurkat-Rott K.



## EDITORIAL VIEWS

Second, we must understand the reasons underlying the limitations in phenotypic accuracy. One possibility is compensation within MH muscle.<sup>12</sup> A recent study<sup>23</sup> measured the sensitivity to caffeine and halothane of 15 MH or CCD/MH mutations, expressed in HEK-293 cells. Each of these mutations had higher sensitivity compared with wild-type, which is in line with the assertion that these mutations are potentially capable of causing MH even though their presence is not invariably associated with MH crises or with positive MH diagnostic tests. Of additional interest was the observation<sup>24</sup> that HEK-293 cells transfected with MH and, particularly CCD mutations, had elevated resting  $\text{Ca}^{2+}$  concentrations. The synthesis of  $\text{Ca}^{2+}$  pumps in these transfected cells was increased by up to twofold, apparently in an effort to compensate for the excess release of  $\text{Ca}^{2+}$  through mutant release channels. Varying degrees of compensatory protein synthesis could account for the problems in phenotypic analysis of MH and explain its gender- and age-dependent expression.<sup>7,25</sup>

A third research direction should attempt to rationalize the numerical similarities that exist between the type of data illustrated in figure 1 and the data published for the sensitivity and specificity of the European and North American phenotypic tests. Although linkage of *RYR1* or *CACNLIA3* to MH with either the European or the North American tests occurs in only about 50% of MH families, the number of discordant patients is low, typically in the range of 1 discordant individual per 10 tests. It is intriguing to note that this number of discordant persons is in the range that would be predicted if the specificity of the phenotypic test were in the 78–94% accuracy range and if the sensitivity were 97–99%. Current limitations of linkage analysis, however, do not support the proposal that linkage really does exist in all of the cases presented in figure 1.

Fourth, because genotyping has the potential to lead to 100% accurate diagnosis, it is clear that identification of new MH loci and new MH mutations should receive priority. However, inaccurate phenotypic diagnosis can create problems in both of these areas. The search for new loci will be frustrated if apparent linkage is based on inaccurate phenotyping. Similarly, the discovery of potentially causal new mutations that may not always link to MH in the extended family confuses the issue of whether they are truly causal mutations. Fortunately, functional analysis of mutant proteins<sup>23,24,26</sup> can help to prove their potential causal nature.

In the next decade, we predict substantial progress in improving MH genotyping, including the identification of additional causal genes and mutations within these genes that are causal of MH. A major goal will be to understand,

at cellular and organ levels, the pathophysiologic disturbances responsible for the clinical syndrome we currently call MH, with the prospect of improving phenotyping. More effective therapies are likely to follow.

**Marilyn Green Larach, M.D., F.A.A.P.**

Senior Research Associate  
The North American Malignant Hyperthermia Registry  
Department of Anesthesiology  
Uniformed Services University of the Health Sciences  
4301 Jones Bridge Road  
Bethesda, Maryland 20814-4799  
mlarach@home.com

**David H. MacLennan, Ph.D., F.R.S.**

University Professor  
Banting and Best Department of Medical Research  
University of Toronto  
Charles H. Best Institute  
112 College Street  
Toronto, Ontario M5G 1L6 Canada  
david.maclennan@utoronto.ca

## References

1. Fletcher JE, Rosenberg H, Aggarwal M: Comparison of European and North American malignant hyperthermia diagnostic protocol outcomes for use in genetic studies. *ANESTHESIOLOGY* 1999; 90:654–61
2. Bachand M, Vachon N, Boisvert M, Mayer FM, Chartrand D: Clinical reassessment of malignant hyperthermia in Abitibi-Temiscamingue. *Can J Anaesth* 1997; 44:696–701
3. Larach MG: Should we reassess the susceptibility of MH patients? *Can J Anaesth* 1997; 44:685–8
4. Larach MG, Localio AR, Allen GC, Denborough MA, Ellis FR, Gronert GA, Kaplan RF, Muldoon SM, Nelson TE, Ørding H, Rosenberg H, Waud BE, Wedel DJ: A clinical grading scale to predict malignant hyperthermia susceptibility. *ANESTHESIOLOGY* 1994; 80:771–9
5. The European Malignant Hyperpyrexia Group: A protocol for the investigation of malignant hyperpyrexia (MH) susceptibility. *Br J Anaesth* 1984; 56:1267–9
6. Larach MG, for the North American Malignant Hyperthermia Group: Standardization of the caffeine halothane muscle contracture test. *Anesth Analg* 1989; 69:511–5
7. Ørding H, for the European Malignant Hyperthermia Group: *In vitro* contracture test for diagnosis of malignant hyperthermia following the protocol of the European MH Group: Results of testing patients surviving fulminant MH and unrelated low-risk subjects. *Acta Anaesthesiol Scand* 1997; 41:955–66
8. Allen GC, Larach MG, Kunselman AR, The North American Malignant Hyperthermia Registry of MHAUS: The sensitivity and specificity of the caffeine-halothane contracture test: A report from the North American Malignant Hyperthermia Registry. *ANESTHESIOLOGY* 1998; 88:579–88
9. Zhang Y, Chen HS, Khanna VK, De Leon S, Phillips MS, Schappert K, Britt BA, Browell AK, MacLennan DH: A mutation in the human ryanodine receptor gene associated with central core disease. *Nat Genet* 1993; 5:46–50
10. Quane KA, Healy JMS, Keating KE, Manning BM, Couch EJ, Palmucci LM, Doriguzzi C, Fagerlund TH, Berg K, Ørding H, Bendixen



## EDITORIAL VIEWS

D, Mortier W, Linz U, Müller CR, McCarthy TV: Mutations in the ryanodine receptor gene in central core disease and malignant hyperthermia. *Nat Genet* 1993; 5:51-5

11. Loke J, MacLennan DH: Malignant hyperthermia and central core disease: Disorders of  $\text{Ca}^{2+}$  release channels. *Am J Med* 1998; 104:470-86

12. MacLennan DH: Discordance between phenotype and genotype in malignant hyperthermia. *Curr Opin Neurol* 1995; 8:397-401

13. MacLennan DH, Duff C, Zorzato F, Fujii J, Phillips M, Korneluk RG, Frodis W, Britt BA, Worton RG: Ryanodine receptor gene is a candidate for predisposition to malignant hyperthermia. *Nature* 1990; 343:559-61

14. McCarthy TV, Healy JMS, Heffron JJ, Lehane M, Deufel T, Lehmann-Horn F, Farrall M, Johnson K: Localization of the malignant hyperthermia susceptibility locus to human chromosome 19q12-13.2. *Nature* 1990; 343:562-4

15. Monnier N, Procaccio V, Stieglitz P, Lunardi J: Malignant hyperthermia susceptibility is associated with a mutation of the alpha 1-subunit of the human dihydropyridine-sensitive L-type voltage-dependent calcium-channel receptor in skeletal muscle. *Am J Hum Genet* 1997; 60:1316-25

16. Robinson RL, Monnier N, Wolz W, Jung M, Reis A, Nuernberg G, Curran JL, Monsieurs K, Stieglitz P, Heytens L, Fricker R, van Broeckhoven C, Deufel T, Hopkins PM, Lunardi J, Müller CR: A genome wide search for susceptibility loci in three European malignant hyperthermia pedigrees. *Hum Mol Genet* 1997; 6:953-61

17. Deufel T, Sudbrak R, Feist Y, Rubsam B, Du Chesne I, Schafer KL, Roewer N, Grimm T, Lehmann-Horn F, Hartung EJ, Müller CR: Discordance, in a malignant hyperthermia pedigree, between in vitro contracture-test phenotypes and haplotypes for the MHS1 region on chromosome 19q12-13.2, comprising the C1840T transition in the RYR1 gene [published erratum appears in *Am J Hum Genet* 1995; 57:520]. *Am J Hum Genet* 1995; 56:1334-42

18. Robinson R, Curran JL, Hall WJ, Halsall PJ, Hopkins PM, Markham AF, Stewart AD, West SP, Ellis FR: Genetic heterogeneity and

HOMOG analysis in British malignant hyperthermia families. *J Med Genet* 1998; 35:196-201

19. Phillips MS, Khanna VK, De Leon S, Frodis W, Britt BA, MacLennan DH: The substitution of Arg for Gly2433 in the human skeletal muscle ryanodine receptor is associated with malignant hyperthermia. *Hum Mol Genet* 1994; 3:2181-6

20. Hopkins PM, Hartung E, Wappler F, The European Malignant Hyperthermia Group: Multicentre evaluation of ryanodine contracture testing in malignant hyperthermia. *Br J Anaesth* 1998; 80:389-94

21. Ørding H, Glahn K, Gardi T, Fagerlund T, Bendixen D: 4-Chloro-m-cresol test—A possible supplementary test for diagnosis of malignant hyperthermia susceptibility. *Acta Anaesthesiol Scand* 1997; 41:967-72

22. Gilly H, Musat I, Fricker R, Bittner RE, Steinbereithner K, Kress HG: Classification of malignant hyperthermia-equivocal patients by 4-chloro-M-cresol. *Anesth Analg* 1997; 85:149-54

23. Tong J, Oyamada H, Demareux N, Grinstein S, McCarthy TV, MacLennan DH: Caffeine and halothane sensitivity of intracellular  $\text{Ca}^{2+}$  release is altered by 15 calcium release channel (ryanodine receptor) mutations associated with malignant hyperthermia and/or central core disease. *J Biol Chem* 1997; 272:26332-9

24. Tong J, McCarthy TV, MacLennan DH: Measurement of resting cytosolic  $\text{Ca}^{2+}$  concentrations and  $\text{Ca}^{2+}$  store size in HEK-293 cells transfected with malignant hyperthermia or central core disease mutant  $\text{Ca}^{2+}$  release channels. *J Biol Chem* 1999; 274: 693-702

25. Larach MG, Fuhrmann LJ, Allen GC: The epidemiology of malignant hyperthermia events in North America, Malignant Hyperthermia. Edited by Morio M, Kikuchi H, Yuge O. Tokyo, Springer Publishers, 1996, pp 39-41

26. Richter M, Schleithoff L, Deufel T, Lehmann-Horn F, Hermann-Frank A: Functional characterization of a distinct ryanodine receptor mutation in human malignant hyperthermia-susceptible muscle. *J Biol Chem* 1997; 272:5256-60

## Anesthesiology

1999; 90:648-50

© 1999 American Society of Anesthesiologists, Inc.

Lippincott Williams & Wilkins, Inc.

## Memory Function during Anesthesia

WHAT happens to the thinking brain during "general anesthesia"? More specifically, are the higher processes

of cognition turned off? Two articles in this issue of ANESTHESIOLOGY show that some form of memory can be formed during what every clinician would call adequate anesthesia.<sup>1,2</sup> These findings are in line with many previous investigations in this area. Anesthesia represents a iatrogenic state in which drug-induced "sleep" and memory interact, usually in the setting of the liberal use of muscle relaxants. During clinically adequate anesthesia, the brain is capable of receiving auditory stimuli and of processing them at a fairly complex level, at least in certain cases.<sup>3-7</sup> Therefore, the brain, although anesthetized, is functional in the higher cognitive sense. Because we still do not know why the brain sleeps, how anesthesia works, or even the workings of memory, it is no surprise that we cannot figure out what happens to memory and cognition during anesthesia. As with sleep,

This Editorial View accompanies the following articles: Münte S, Kobbe I, Demertzis A, Lüllwitz E, Münte TF, Piepenbrock S, Leuwer M: Increased reading speed for stories presented during general anesthesia. *ANESTHESIOLOGY* 1999; 90:662-9; and Lubke GH, Kerssens C, Phaf H, Sebel PS: Dependence of explicit and implicit memory on hypnotic state in trauma patients. *ANESTHESIOLOGY* 1999; 90:670-80.

Accepted for publication December 1, 1998.

Key words: Awareness; electroencephalography; implicit memory; monitoring; neuropsychologic testing.
